# Supplementary material
Source: HighWire-hosted journal article supplement (https://bmjopen.bmj.com/content/12/3/e058725)
Supplement: inline-supplementary-material-2 [file inline-supplementary-material-2.pdf]

## SUPPLEMENTARY MATERIAL

*Supplementary File 2. e-Delphi participant demographics for Rounds 1, 2 and 3<sup>1</sup>*

| VARIABLE                                 |                               | ROUND 1<br>(N=38) | ROUND 2<br>(N=23) | ROUND 3<br>(N=21) |
|------------------------------------------|-------------------------------|-------------------|-------------------|-------------------|
| <b>Age, years</b>                        | 18-24                         | 0 (0%)            | 0 (0%)            | 0 (0%)            |
|                                          | 25-34                         | 5 (13.2%)         | 2 (8.7%)          | 3 (14.3%)         |
|                                          | 35-44                         | 13 (34.2%)        | 10 (43.5%)        | 7 (33.3%)         |
|                                          | 45-54                         | 12 (31.6%)        | 6 (26.1%)         | 7 (33.3%)         |
|                                          | 55-64                         | 8 (21.1%)         | 5 (21.7%)         | 4 (19.1%)         |
|                                          | 65+                           | 0 (0%)            | 0 (0%)            | 0 (0%)            |
| <b>Gender</b>                            | Female                        | 32 (84.2%)        | 19 (82.6%)        | 18 (85.7%)        |
|                                          | Male                          | 5 (13.1%)         | 4 (17.4%)         | 3 (14.3%)         |
|                                          | Other                         | 1 (2.6%)          | 0 (0%)            | 0 (0%)            |
| <b>Stakeholder group<sup>2</sup></b>     | Clinician                     | 20 (52.6%)        | 12 (52.2%)        | 10 (43.4%)        |
|                                          | Researcher                    | 18 (47.4%)        | 11 (47.8%)        | 9 (42.8%)         |
|                                          | Decision Maker                | 12 (31.6%)        | 5 (21.7%)         | 7 (33.3%)         |
| <b>Discipline background<sup>2</sup></b> | Nursing                       | 5 (12.5%)         | 2 (8.7%)          | 5 (23.8%)         |
|                                          | Occupational therapy          | 5 (12.5%)         | 3 (13.0%)         | 2 (9.5%)          |
|                                          | Physiotherapy                 | 5 (12.5%)         | 2 (8.7%)          | 3 (14.3%)         |
|                                          | Medicine                      | 4 (10%)           | 2 (8.7%)          | 2 (9.5%)          |
|                                          | Speech pathology              | 3 (7.5%)          | 2 (8.7%)          | 2 (9.5%)          |
|                                          | Psychology                    | 3 (7.5%)          | 1 (13.0%)         | 0 (0%)            |
|                                          | Dietetics                     | 3 (7.5%)          | 2 (8.7%)          | 2 (9.5%)          |
|                                          | Pharmacy                      | 3 (7.5%)          | 1 (4.3%)          | 1 (4.8%)          |
|                                          | Audiology                     | 3 (7.5%)          | 2 (8.7%)          | 1 (4.8%)          |
|                                          | Social work                   | 2 (5%)            | 2 (8.7%)          | 1 (4.8%)          |
|                                          | Other <sup>3</sup>            | 4 (10%)           | 3 (13.0%)         | 2 (9.5%)          |
| <b>Area of specialty</b>                 | Multiple clinical specialties | 9 (15.5%)         | 6 (26.1%)         | 2 (9.5%)          |
|                                          | Geriatrics                    | 13 (22.4)         | 6 (26.1%)         | 4 (19.1%)         |
|                                          | Stroke                        | 10 (17.2%)        | 4 (17.4%)         | 3 (14.3%)         |

## SUPPLEMENTARY MATERIAL

|                                                         |                                                                        |            |           |           |
|---------------------------------------------------------|------------------------------------------------------------------------|------------|-----------|-----------|
| <b>(clinicians and researchers)</b>                     | Acquired brain injury                                                  | 7 (12.1%)  | 2 (8.7%)  | 3 (14.3%) |
|                                                         | Progressive neurological conditions                                    | 7 (12.1%)  | 1 (4.3%)  | 2 (9.5%)  |
|                                                         | Spinal cord injury                                                     | 2 (3.4%)   | 0 (0%)    | 0 (0%)    |
|                                                         | Other <sup>4</sup>                                                     | 10 (17.2%) | 1 (4.3%)  | 1 (4.8%)  |
| <b>Years of experience (clinicians)</b>                 | 1-3                                                                    | 2 (10%)    | 1 (8.3%)  | 1 (10.0%) |
|                                                         | 3-5                                                                    | 1 (5%)     | 2 (16.7%) | 0 (0%)    |
|                                                         | 5+                                                                     | 17 (85%)   | 9 (75.0%) | 9 (90.0%) |
| <b>Career stage (researchers)</b>                       | Pre-doctoral                                                           | 7 (38.9%)  | 3 (27.3%) | 4 (44.4%) |
|                                                         | Post-doctoral: Early-mid career researcher ( $\leq 15$ years post-PhD) | 7 (39.9%)  | 5 (45.4%) | 2 (22.2%) |
|                                                         | Post-doctoral: Experienced researcher ( $>16$ years post-PhD)          | 4 (22.2%)  | 3 (27.3%) | 3 (33.3%) |
| <b>Years of managerial experience (decision makers)</b> | 1-3                                                                    | 1 (8.3%)   | 0 (0%)    | 0 (0%)    |
|                                                         | 3-5                                                                    | 0 (0%)     | 0 (0%)    | 0 (0%)    |
|                                                         | 5+                                                                     | 11 (91.7%) | 5 (100%)  | 5 (100%)  |

<sup>1</sup>Whilst there were 38, 32 and 28 participants in Rounds 1, 2, and 3 (respectively), descriptive data was only available for 23 participants for Round 2 (72%) and 21 participants for Round 3 (75%).

<sup>2</sup>Participants were able to select more than one response.

<sup>3</sup>Includes "Health services research", "Biomedical science", "Rehabilitation Engineering" and "Sociology".

<sup>4</sup>Includes "Major trauma/burns", "Amputation", "Deconditioning", "Scope of practice", "Hearing impairment and rehabilitation", "mental health", "Ankle fracture", "trauma data analysis", "health economics" and "orthopaedic conditions".
